# Supplementary figures and images for: Emodin influence pyroptosis-related Caspase 1-GSDMD axis alleviated cerebral ischemia-reperfusion injury in rats
Source: Research Square preprint supplement (doi:10.21203/rs.3.rs-6149634/v1), 2025-03-20

1. caspase 1

1a


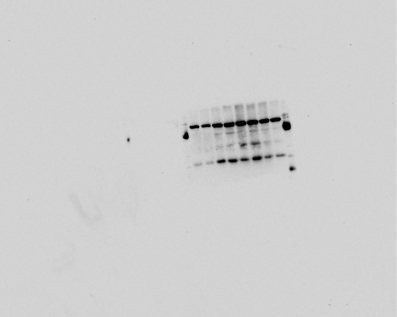


2)GSDMD

1c


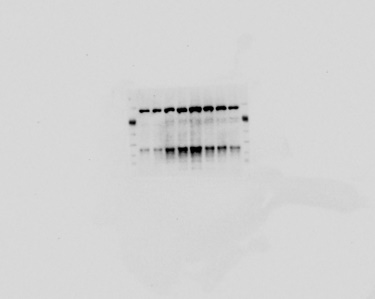


3）NLRP 3

1e


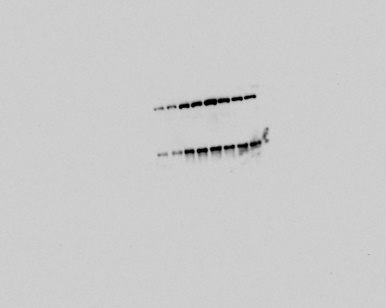


4) caspase 1

4a


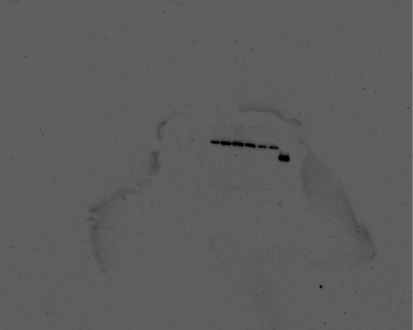


5)GSDMD

4c


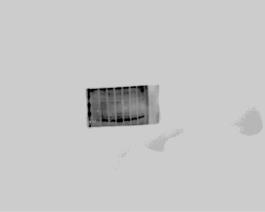


6）NLRP 3

4e


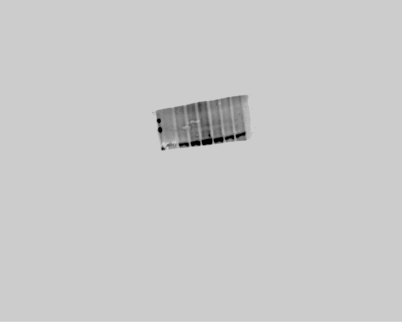

Supplement: Supplementary file 1 [file f0faca4b6ce881750c9043e2.docx]
